# Supplementary material for: Role of the MDR Efflux Pump AcrAB in Epithelial Cell Invasion by Shigella flexneri
Source: MDPI journal article supplement (doi:10.3390/biom13050823), 2023-05-11
Supplement: s1 [file s1]

**Table S1.** Oligonucleotides used in this study.

| Chromosomal deletions      |                                                                            |
|----------------------------|----------------------------------------------------------------------------|
| Name                       | 5'-3' sequence                                                             |
| SfAF                       | ACTTTTGACCATTGACCAATTTGAAATCGGACACTCGAGGTTTACATATGTGTA<br>GGCTGGAGCTGCTTCG |
| SfBR                       | AAAGAATACCGGAACGAAGAAGATTGCCAGTACCGTTGCGATATGAATATCCT<br>CCTTAGT           |
| SfAR                       | TAGGCATGTCTTAACGGCTCCTGTTTAAGTTAAGACTTGGACTGTTTCAGGCATA<br>TGAATATCCTCCTTA |
| SfBF                       | CCTGAACAGTCCAAGTCTTAACTTAAACAGGAGCCGTTAAGACATGCCTATGT<br>AGGCTGGAGCTGCTTCG |
| Plasmids construction      |                                                                            |
| Name                       | 5'-3' sequence                                                             |
| pSfacrBF                   | NNGGATCCATGCCTAATTTCTTTATCGATCGC                                           |
| pSfacrBR                   | NNGGATCCGATCCTGAGTTGGTGGTTCAATTACT                                         |
| pSfacrB <sub>D408A</sub> F | CATCGGCTTGTTGGTGGATGCCGCTATCGTTGTGGTAGAAA                                  |
| pSfacrB <sub>D408A</sub> R | TTTCTACCACAACGATAGCGGCATCCACCAACAAGCCGATGG                                 |
