# Supplementary figures and images for: Role of the MDR Efflux Pump AcrAB in Epithelial Cell Invasion by Shigella flexneri
Source: MDPI journal article supplement (doi:10.3390/biom13050823), 2023-05-11

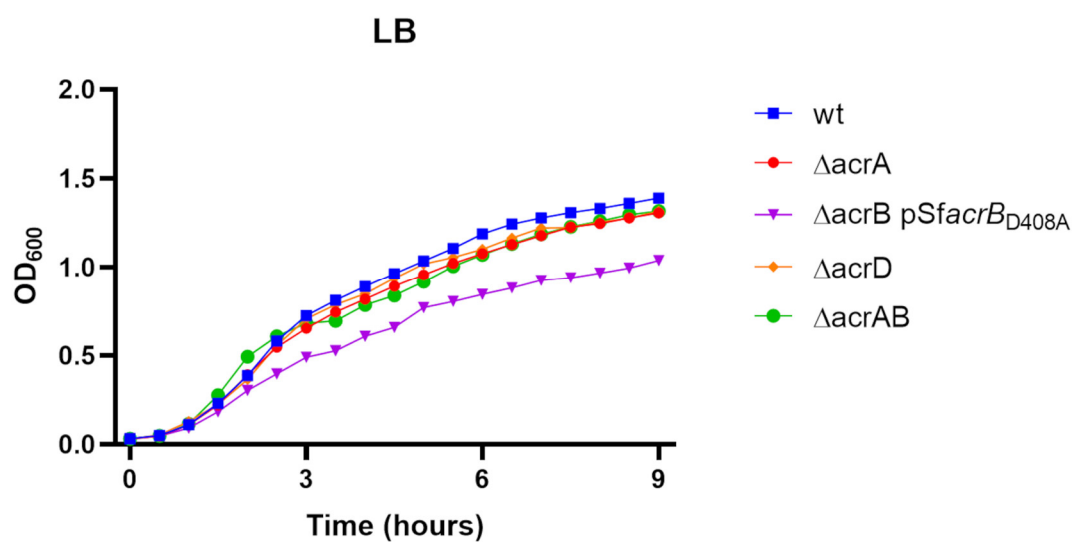

**Figure S1.** Growth curves of M90T wt and derivative strains.

Supplement: s1 [file s1]
